# Supplementary figures and images for: Optimization of a modified Captiva EMR-lipid method based on micro-matrix solid-phase dispersion coupled with gas chromatography-mass spectrometry for the determination of nine bisphenols in mussel samples
Source: Royal Society of Chemistry journal article supplement (doi:10.1039/d4ay00738g), 2024-01-01

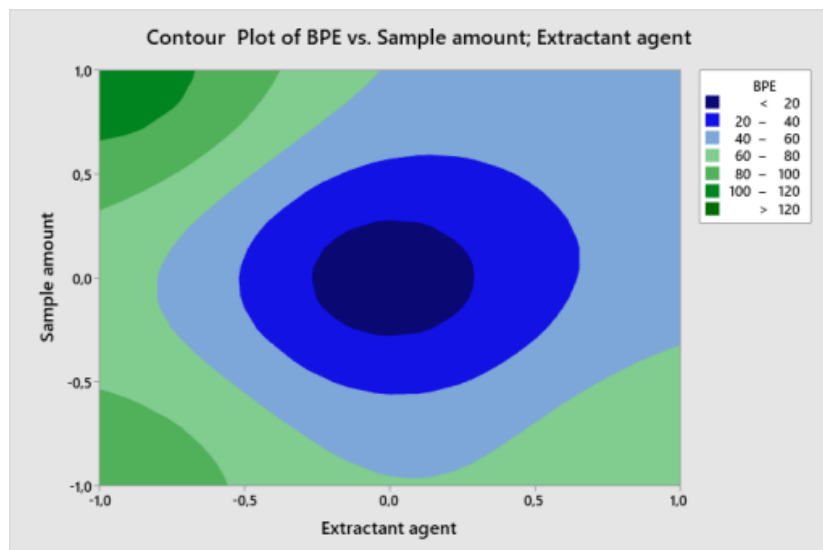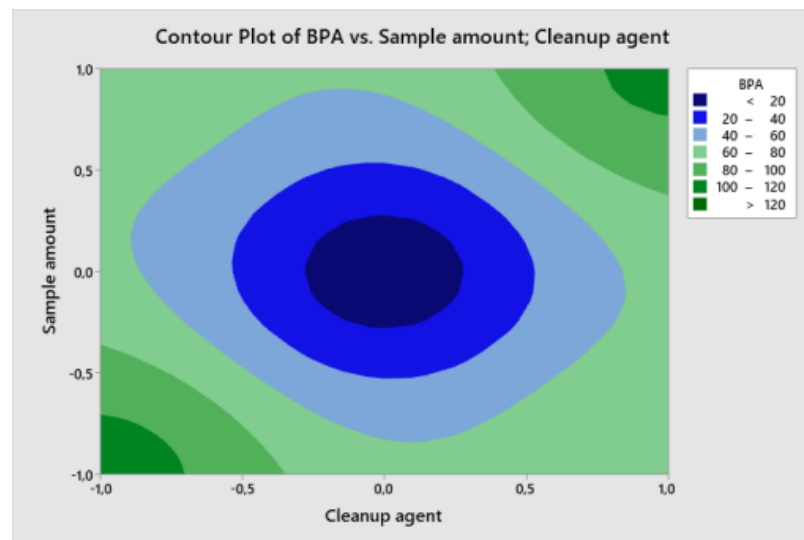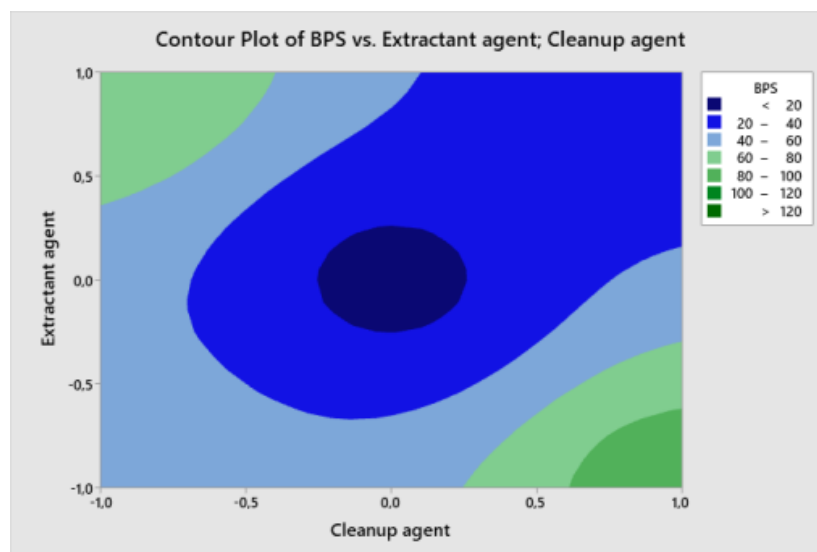

Supplement: d4ay00738g1.pdf [file d4ay00738g1.pdf]
